# Supplementary material
Source: PubMed Central journal article supplement (PMC4201141)
Supplement: supp_mol.114.092742_Supplemental_Files_92742.pdf [file supp_mol.114.092742_Supplemental_Files_92742.pdf]

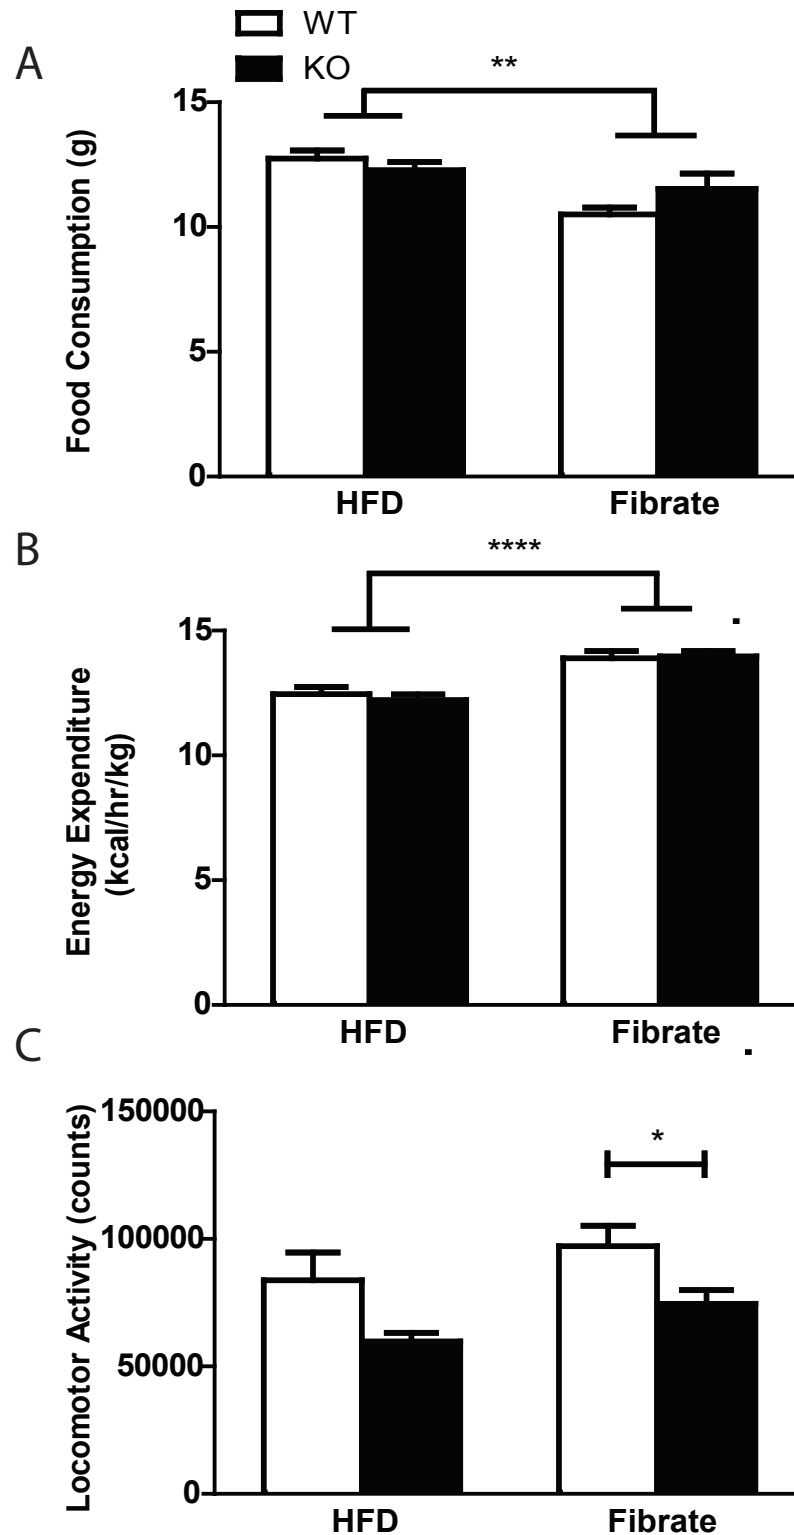

**Supplemental Figure 1. Metabolic parameters.** Accumulative food consumption (A) and locomotor activity (C) of a subgroup of mice were recorded during 72 hour stay in metabolic cages. Energy expenditure (B) was calculated based on recorded oxygen and carbon dioxide flow. Statistical comparison between fibrate treatment and control groups was made using two-way ANOVA (mean $\pm$ SEM, n=3~6). Asterisks over lines terminating in horizontal bars indicate a significant overall effect of fibrate treatment regardless of genotype. \*\*  $p < 0.01$ , \*\*\*\*  $p < 0.0001$ . Significance of difference between two genotypes within each group was analyzed using student test (mean $\pm$ SEM, n=3~6). Asterisks over bars terminating in vertical lines indicate a significant difference between genotypes within either fibrate treated or control groups. \*  $p < 0.05$ .

|                                              | D2+feno vs WT+feno |            |            |            | WT+feno vs WT |            |            |            | D2 vs WT   |            |            |            |
|----------------------------------------------|--------------------|------------|------------|------------|---------------|------------|------------|------------|------------|------------|------------|------------|
| KEGG pathways                                | GSEA.MIXED         | GSEA.UP    | GSEA.DOWN  | HyperG     | GSEA.MIXED    | GSEA.UP    | GSEA.DOWN  | HyperG     | GSEA.MIXED | GSEA.UP    | GSEA.DOWN  | HyperG     |
| Fatty acid metabolism                        | 1                  | 1          | 1          | 1          | 3.20E-17      | 3.70E-22   | 1          | 2.13E-13   | 0.95100957 | 0.00270026 | 0.99729988 | 1          |
| PPAR signaling pathway                       | 0.00096912         | 0.12464977 | 0.87535272 | 1          | 8.80E-23      | 3.27E-21   | 1          | 5.39E-13   | 0.65427925 | 0.00162494 | 0.99837512 | 1          |
| Biosynthesis of unsaturated fatty acids      | 0.00065811         | 0.95465039 | 0.04535147 | 0.00343984 | 4.79E-13      | 8.19E-14   | 1          | 3.24E-12   | 0.99188656 | 3.30E-05   | 0.99996698 | 1          |
| Peroxisome                                   | 1                  | 1          | 1          | 1          | 5.86E-16      | 1.94E-12   | 1          | 8.52E-08   | 0.53427295 | 0.00898987 | 0.9910104  | 1          |
| Retinol metabolism                           | 3.96E-05           | 0.92187491 | 0.07812845 | 1          | 2.16E-09      | 4.80E-06   | 0.9999952  | 5.35E-05   | 1          | 1          | 1          | 1          |
| alpha-Linolenic acid metabolism              | 0.00697004         | 0.39266755 | 0.60734404 | 1          | 0.00190909    | 0.00160139 | 0.99839877 | 0.00045712 | 1          | 1          | 1          | 1          |
| Linoleic acid metabolism                     | 0.00174859         | 0.98447744 | 0.01552355 | 1          | 0.0042867     | 0.64672064 | 0.35328874 | 0.0027794  | 0.07920467 | 0.98623573 | 0.01376516 | 1          |
| Steroid hormone biosynthesis                 | 1.78E-05           | 0.98809055 | 0.01191031 | 1          | 0.00018913    | 0.59544969 | 0.40456102 | 0.0027794  | 1          | 1          | 1          | 1          |
| Arachidonic acid metabolism                  | 0.05419413         | 0.01316915 | 0.9868314  | 1          | 8.44E-05      | 0.16370998 | 0.83629399 | 0.00473957 | 1          | 1          | 1          | 1          |
| Metabolic pathways                           | 0.00056624         | 0.99750506 | 0.00249497 | 1          | 1.44E-12      | 3.28E-10   | 1          | 0.00527475 | 1          | 1          | 1          | 1          |
| Primary bile acid biosynthesis               | 0.00492676         | 0.44229647 | 0.55771383 | 1          | 0.04597224    | 0.1874081  | 0.81259892 | 0.01036848 | 1          | 1          | 1          | 1          |
| Butanoate metabolism                         | 0.03726383         | 0.93293917 | 0.06706406 | 1          | 0.00354978    | 0.00042459 | 0.99957545 | 0.02995828 | 1          | 1          | 1          | 1          |
| Ascorbate and aldarate metabolism            | 0.01240464         | 0.99520207 | 0.00479842 | 1          | 0.00815005    | 0.00266385 | 0.99733644 | 0.04016961 | 1          | 1          | 1          | 1          |
| Pentose and glucuronate interconversions     | 0.04333487         | 0.98274899 | 0.01725244 | 1          | 1             | 1          | 1          | 0.04903351 | 1          | 1          | 1          | 1          |
| Drug metabolism - cytochrome P450            | 0.01488436         | 0.99990426 | 9.57E-05   | 1          | 1             | 1          | 1          | 1          | 0.01910067 | 0.98181433 | 0.01818633 | 0.00550969 |
| Metabolism of xenobiotics by cytochrome P450 | 0.02486089         | 0.95192918 | 0.04807263 | 1          | 0.0465167     | 0.00475572 | 0.99524453 | 1          | 0.95944975 | 0.00247296 | 0.99752718 | 0.00812141 |
| Bile secretion                               | 1                  | 1          | 1          | 1          | 1             | 1          | 1          | 1          | 0.75951193 | 0.02263671 | 0.97736418 | 0.01942718 |
| Glycerophospholipid metabolism               | 0.00782757         | 0.99999432 | 5.68E-06   | 0.01079493 | 1             | 1          | 1          | 1          | 0.03107313 | 0.99999313 | 6.87E-06   | 1          |
| Protein processing in endoplasmic reticulum  | 0.01694736         | 0.99999388 | 6.12E-06   | 0.02189606 | 0.66359472    | 0.9999146  | 8.54E-05   | 1          | 0.00241366 | 0.99998424 | 1.58E-05   | 1          |
| Pyruvate metabolism                          | 0.00023007         | 0.99996588 | 3.41E-05   | 0.02262259 | 0.03103441    | 0.99999966 | 3.43E-07   | 1          | 2.28E-05   | 0.99999981 | 1.95E-07   | 1          |
| Citrate cycle (TCA cycle)                    | 1                  | 1          | 1          | 0.03759077 | 0.35226227    | 0.00216206 | 0.997838   | 1          | 0.04100324 | 0.65631236 | 0.34369053 | 1          |
| Nitrogen metabolism                          | 0.00502667         | 0.99978246 | 0.00021756 | 0.0426084  | 0.12524887    | 4.12E-05   | 0.99995882 | 1          | 1          | 1          | 1          | 1          |
| Cell cycle                                   | 0.04797371         | 0.96322433 | 0.03677822 | 1          | 0.15139167    | 0.98944154 | 0.01055935 | 1          | 0.0062972  | 0.99506534 | 0.00493511 | 1          |
| Spliceosome                                  | 0.14981607         | 0.99847551 | 0.0015246  | 1          | 0.00080659    | 0.16845591 | 0.83154952 | 1          | 1          | 1          | 1          | 1          |
| RNA transport                                | 0.2379308          | 0.99447448 | 0.00552587 | 1          | 0.00092794    | 0.25383159 | 0.74617549 | 1          | 1          | 1          | 1          | 1          |
| RNA degradation                              | 0.01970374         | 0.99317123 | 0.00682906 | 1          | 0.00133719    | 0.01120835 | 0.9887921  | 1          | 1          | 1          | 1          | 1          |
| Glycolysis / Gluconeogenesis                 | 0.00186937         | 0.76849499 | 0.23150931 | 1          | 0.02129655    | 0.01899757 | 0.98100308 | 1          | 1          | 1          | 1          | 1          |
| Vasopressin-regulated water transport        | 0.04574682         | 0.83020095 | 0.16980368 | 1          | 1             | 1          | 1          | 1          | 1          | 1          | 1          | 1          |

**Supplemental Table 1. Statistical analysis of KEGG pathway enrichment.** Table showing the pathway enrichment probabilities (p-values) of the comparisons: D2+fenofibrate vs WT+fenofibrate, WT+fenofibrate vs WT, and D2 vs WT. We computed the Gene Set Enrichment Analysis (GSEA) based on a set of probe-wise t statistics arising from microarray analysis. GSEA.MIXED) upregulated or downregulated genes black-shading, GSEA.UP) upregulated genes with positive t statistics red-shading when enrichment probability  $p < 0.05$ , GSEA.DOWN) downregulated genes with negative t statistics green-shading when enrichment probability  $p < 0.05$ ; and Hypergeometric distribution function (HyperG) arising from the subset of genes with differential expression in each comparison at  $p < 0.05$ .

Supplemental Table 2. The MicroarraysExpression file includes the differential expressed genes of the microarray data analysis from livers of WT and D2 KO mice treated with fibrate. The Excel file sheets correspond to the gene lists for the contrasts: D2 vs WT, WT+feno vs WT and D2+feno vs WT+feno, after fitting a linear model and computing moderated t-statistics by the empirical Bayesian model. Column fields: (A) the average log<sub>2</sub>-expression for the probe over all arrays and channels, (B) the estimate of the log<sub>2</sub>-fold-change corresponding to the contrast, (C) moderated t-statistics which is computed for each probe and for each contrast. This has the same interpretation as an ordinary t-statistic except that the standard errors have been moderated across genes, using a simple Bayesian model, (D) t statistic p-values, (E) t-statistic p-values adjusted for multiple testing by the Benjamini & Hochberg method (Benjamini and Hochberg, 1995), which controls the expected false discovery rate (FDR) below 0.05, (F) the moderated F-statistic that combines the t-statistics for all the contrasts into an overall test of significance for that gene. The F-statistic tests calculates whether a given gene is differentially expressed

Benjamini Y and Hochberg Y (1995) Controlling the False Discovery Rate - a Practical and Powerful Approach to Multiple Testing. *J Roy Stat Soc B Met* **57**(1): 289-300.

























[illegible]



[illegible]





[illegible]
